# Supplementary material for: The copper-free Sonogashira cross-coupling reaction promoted by palladium complexes of nitrogen-containing chelating ligands in neat water at room temperature
Source: Royal Society of Chemistry journal article supplement (doi:10.1039/c3dt52970c), 2013-11-11

## Supporting information

*for*

### **Copper-free Sonogashira Cross-coupling Reaction Promoted by a Nitrogen-containing Chelating Ligand in Neat Water at Room Temperature**

Hong Zhong, Jinyun Wang, Liuyi Li and Ruihu Wang\*

#### **Content**

- S2 Fig. S1 The conversion of iodobenzene as a function of palladium loading.
- S3 Table S1 Charge distribution of dpa and Pd-dpa.
- S4 Table S2 The optimized geometry coordinates of dpa
- S5 Table S3 The optimized geometry coordinates of Pd-dpa
- S6-19 NMR spectra of the coupling products

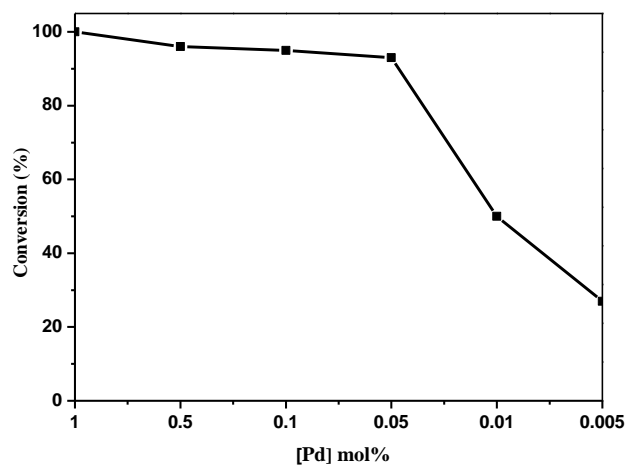

**Fig. S3** The conversion of iodobenzene as a function of palladium loading. Reaction conditions: iodobenzene (0.50 mmol), phenylacetylene (0.75 mmol), Pd(NH<sub>3</sub>)<sub>2</sub>Cl<sub>2</sub>-dpa (0.1 mol%), NEt<sub>3</sub> (1.50 mmol), H<sub>2</sub>O (2.0 mL) under N<sub>2</sub> at 25 °C for 6 h.

**Table S1** Charge distribution of dpa and Pd-dpa.

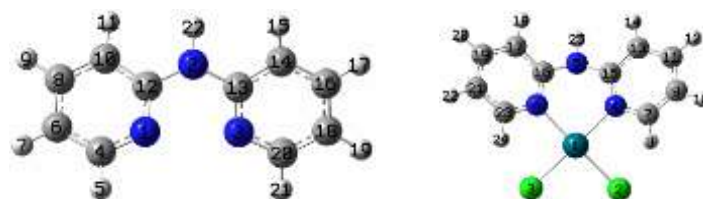

| Atoms in dpa | Natural charge | Atoms in Pd-dpa | Natural charge |
|--------------|----------------|-----------------|----------------|
|              |                | Pd1             | 0.70234        |
|              |                | Cl2             | -0.52523       |
|              |                | Cl3             | -0.52523       |
| N1           | -0.46163       | N4              | -0.50062       |
| N2           | -0.64026       | N5              | -0.61948       |
| N3           | -0.46162       | N6              | -0.50064       |
| C4           | 0.02331        | C7              | 0.06497        |
| H5           | 0.23314        | H8              | 0.28089        |
| C6           | -0.31525       | C9              | -0.29543       |
| H7           | 0.2502         | H10             | 0.26748        |
| C8           | -0.20085       | C11             | -0.17679       |
| H9           | 0.24898        | H12             | 0.2604         |
| C10          | -0.30796       | C13             | -0.30094       |
| H11          | 0.24301        | H14             | 0.25146        |
| C12          | 0.39211        | C15             | 0.41355        |
| C13          | 0.39211        | C16             | 0.41357        |
| C14          | -0.30797       | C17             | -0.30094       |
| H15          | 0.243          | H18             | 0.25146        |
| C16          | -0.20085       | C19             | -0.17679       |
| H17          | 0.24898        | H20             | 0.2604         |
| C18          | -0.31525       | C21             | -0.29544       |
| H19          | 0.2502         | H22             | 0.26748        |
| C20          | 0.02333        | C23             | 0.06498        |
| H21          | 0.23314        | H24             | 0.28089        |
| H22          | 0.43015        | H25             | 0.43765        |

**Table S2** The optimized geometry coordinates of dpa

| Atom | Coordinates (Angstroms) |           |           |
|------|-------------------------|-----------|-----------|
|      | X                       | Y         | Z         |
| N1   | -1.372437               | 0.779776  | -0.543944 |
| N2   | -0.000041               | -1.050898 | 0.000091  |
| N3   | 1.372518                | 0.779715  | 0.544135  |
| C4   | -2.590748               | 1.332999  | -0.578148 |
| H5   | -2.638310               | 2.333876  | -1.003080 |
| C6   | -3.750584               | 0.701146  | -0.129785 |
| H7   | -4.712607               | 1.198355  | -0.193990 |
| C8   | -3.624142               | -0.587570 | 0.399577  |
| H9   | -4.493791               | -1.125144 | 0.766798  |
| C10  | -2.365069               | -1.169865 | 0.470606  |
| H11  | -2.227194               | -2.156045 | 0.905024  |
| C12  | -1.259385               | -0.443529 | -0.018198 |
| C13  | 1.259382                | -0.443556 | 0.018283  |
| C14  | 2.365002                | -1.169892 | -0.470568 |
| H15  | 2.227186                | -2.156135 | -0.904871 |
| C16  | 3.624103                | -0.587552 | -0.399757 |
| H17  | 4.493695                | -1.125221 | -0.766974 |
| C18  | 3.750601                | 0.701139  | 0.129557  |
| H19  | 4.712581                | 1.198463  | 0.193509  |
| C20  | 2.590796                | 1.332930  | 0.578211  |
| H21  | 2.638463                | 2.333763  | 1.003253  |
| H22  | -0.000042               | -2.059568 | -0.000308 |

**Table S3** The optimized geometry coordinates of Pd-dpa

| Atom | Coordinates (Angstroms) |           |           |
|------|-------------------------|-----------|-----------|
|      | X                       | Y         | Z         |
| Pd1  | 0.061318                | -1.053903 | -0.003167 |
| C12  | -0.137091               | -2.689198 | -1.654150 |
| C13  | -0.143952               | -2.700660 | 1.635541  |
| N4   | 0.207872                | 0.458836  | -1.465120 |
| N5   | -0.835742               | 2.005846  | 0.006084  |
| N6   | 0.202743                | 0.448487  | 1.469867  |
| C7   | 0.734812                | 0.182345  | -2.681149 |
| H8   | 1.143325                | -0.814696 | -2.787730 |
| C9   | 0.702430                | 1.083539  | -3.734236 |
| H10  | 1.130084                | 0.806333  | -4.690785 |
| C11  | 0.091009                | 2.325289  | -3.533012 |
| H12  | 0.029121                | 3.053115  | -4.336339 |
| C13  | -0.421855               | 2.628098  | -2.280978 |
| H14  | -0.876987               | 3.593217  | -2.080721 |
| C15  | -0.330266               | 1.671453  | -1.252655 |
| C16  | -0.334884               | 1.662517  | 1.264202  |
| C17  | -0.430440               | 2.611657  | 2.299110  |
| H18  | -0.885243               | 3.578026  | 2.104238  |
| C19  | 0.078146                | 2.299956  | 3.550680  |
| H20  | 0.013196                | 3.021941  | 4.359018  |
| C21  | 0.689315                | 1.056984  | 3.745075  |
| H22  | 1.113801                | 0.773074  | 4.701070  |
| C23  | 0.725569                | 0.163374  | 2.685674  |
| H24  | 1.133972                | -0.834300 | 2.786517  |
| H25  | -1.306441               | 2.899865  | 0.008375  |

## NMR spectra of the coupling products

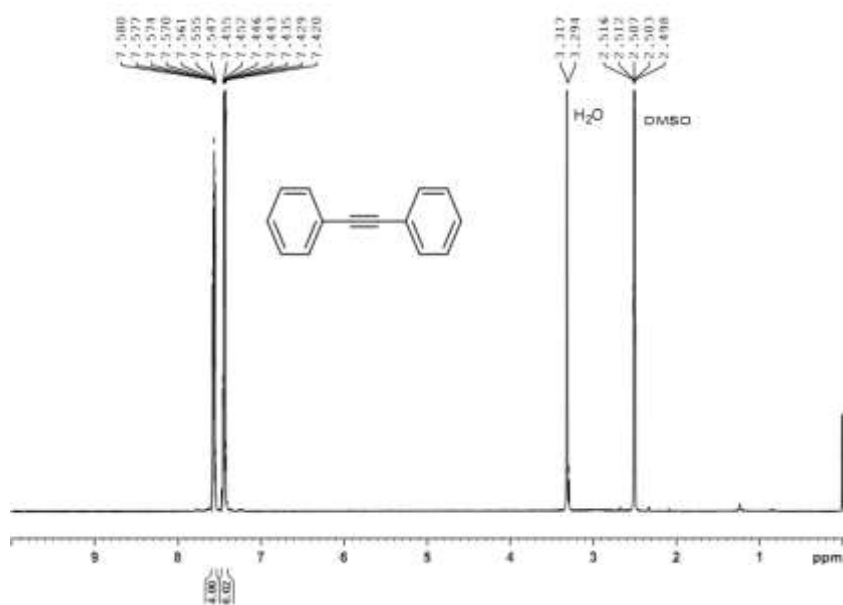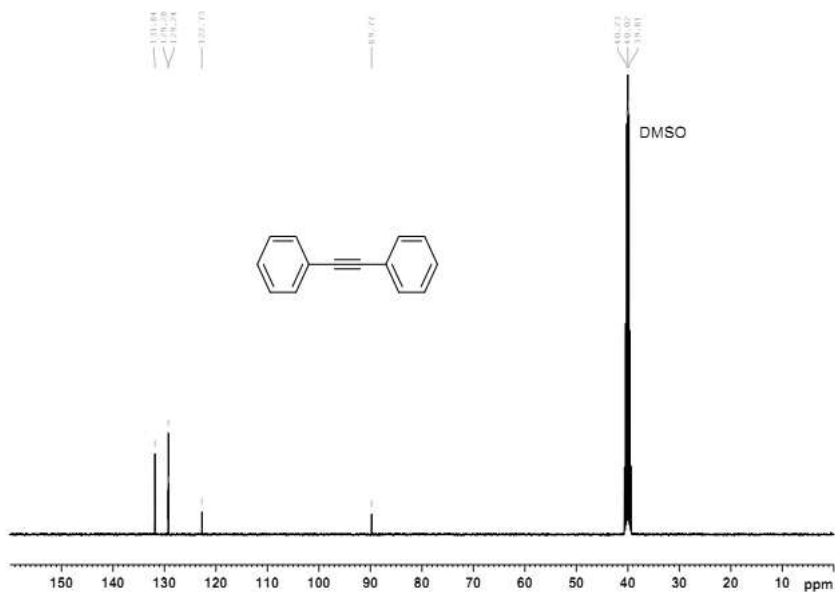

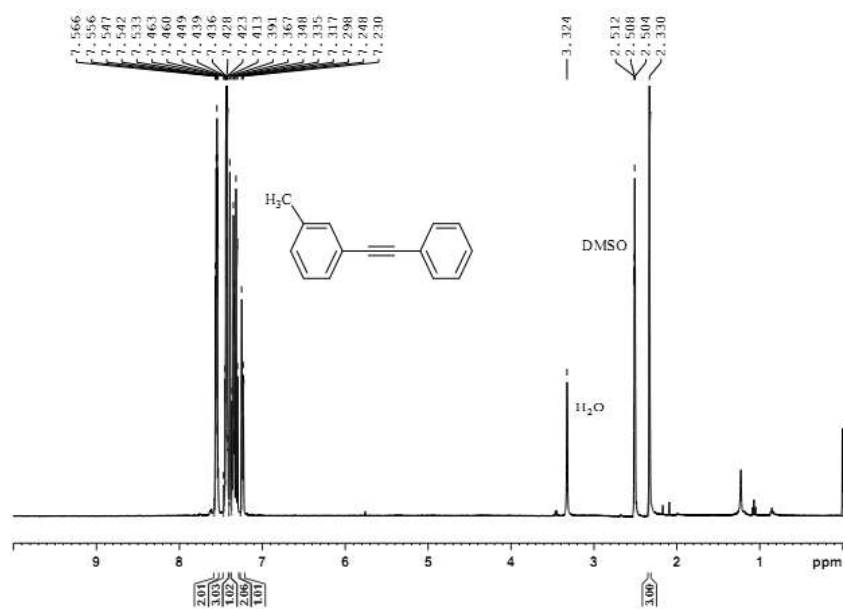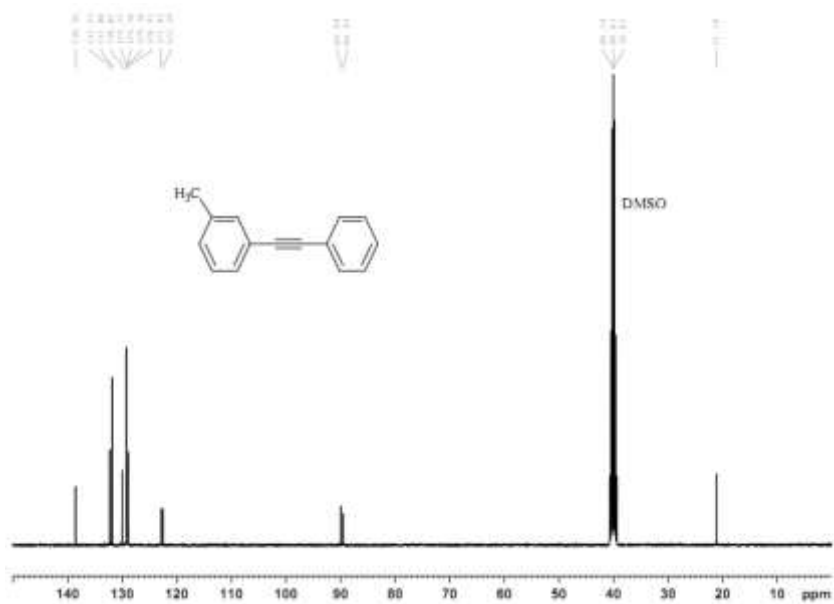

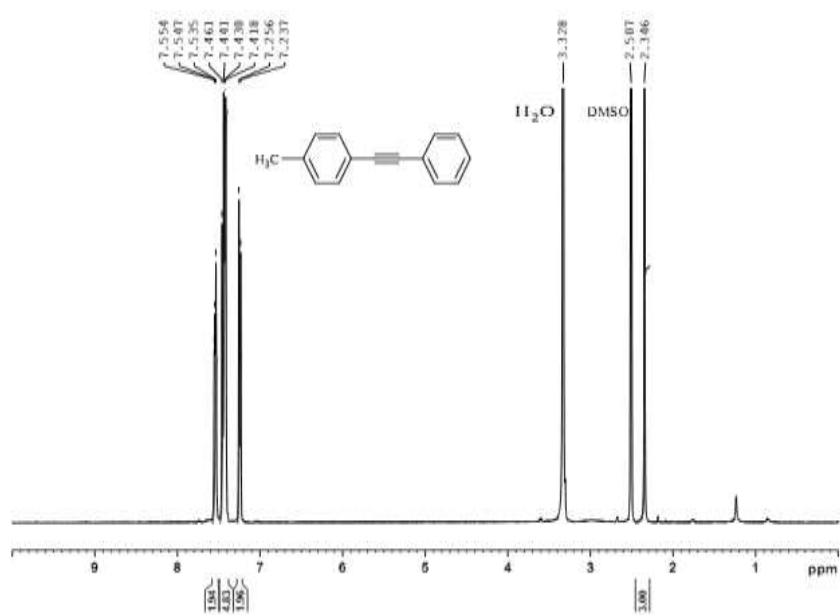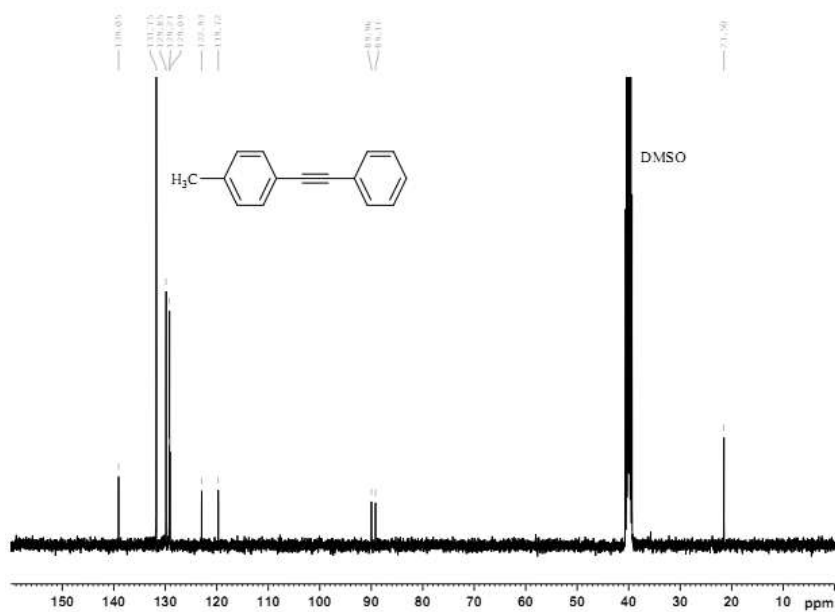



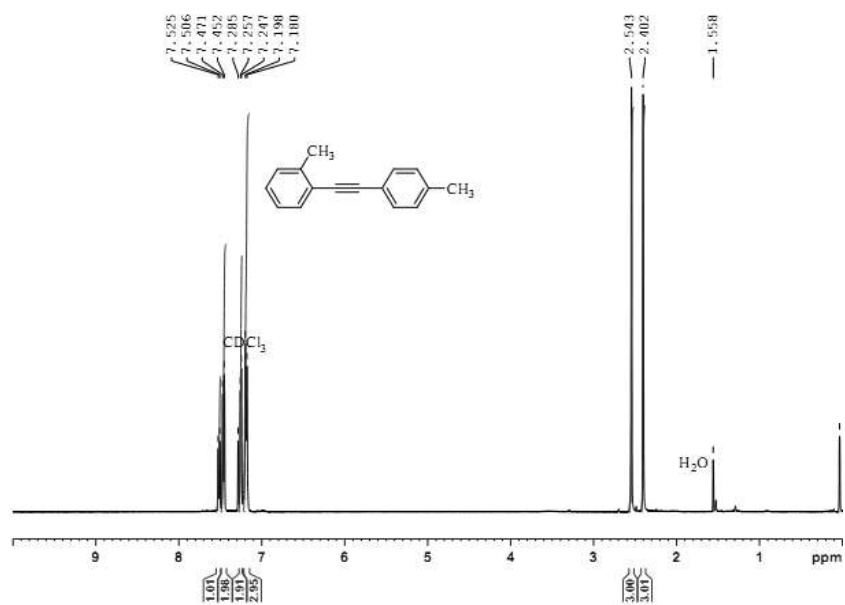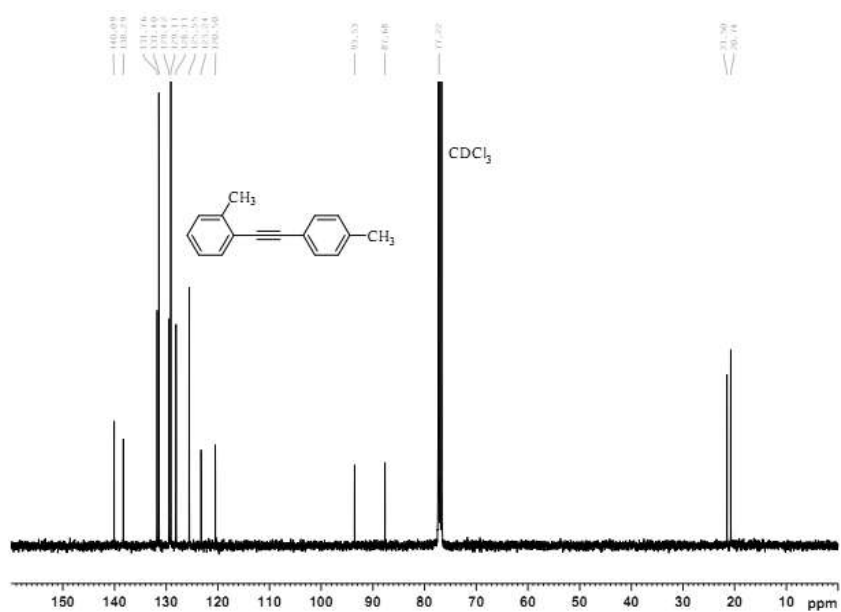

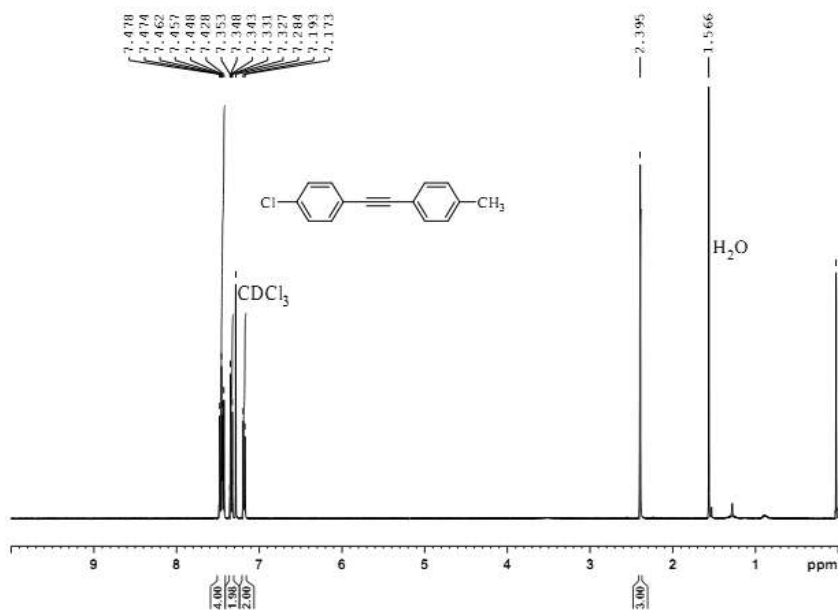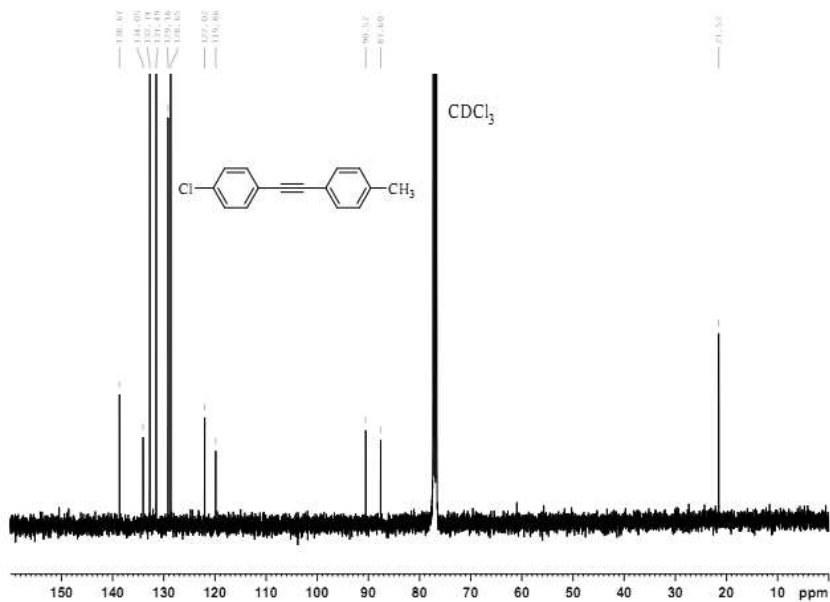

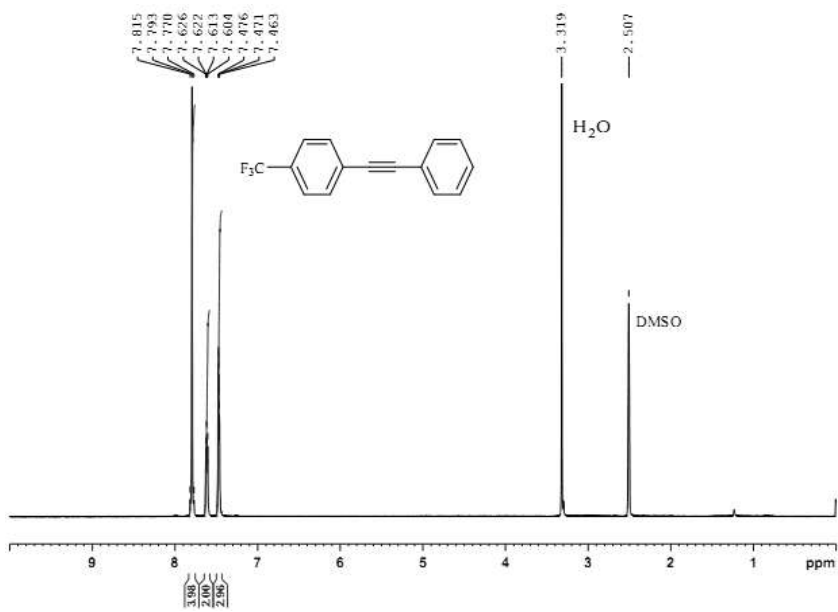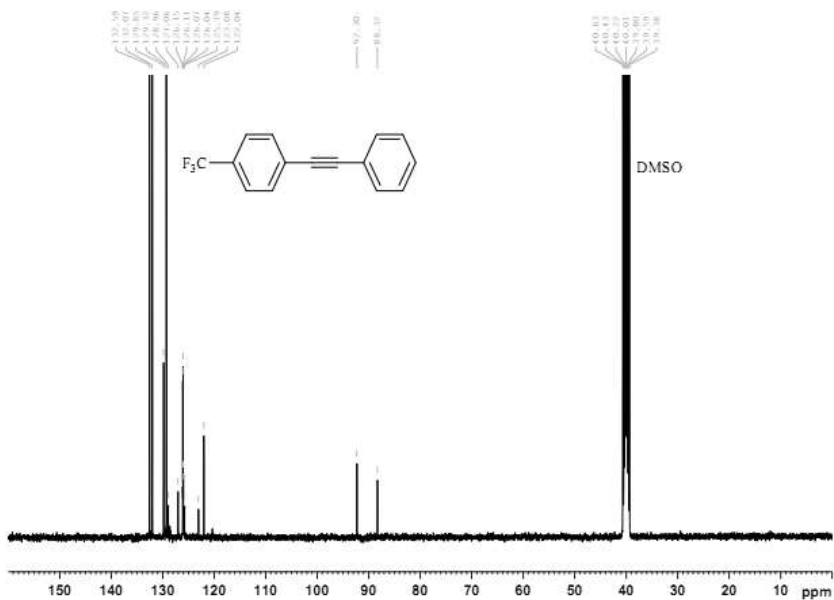

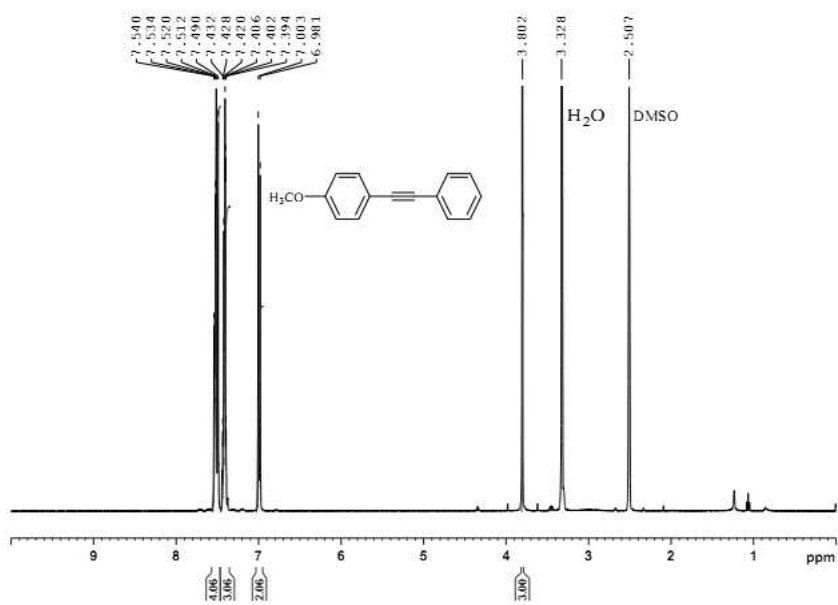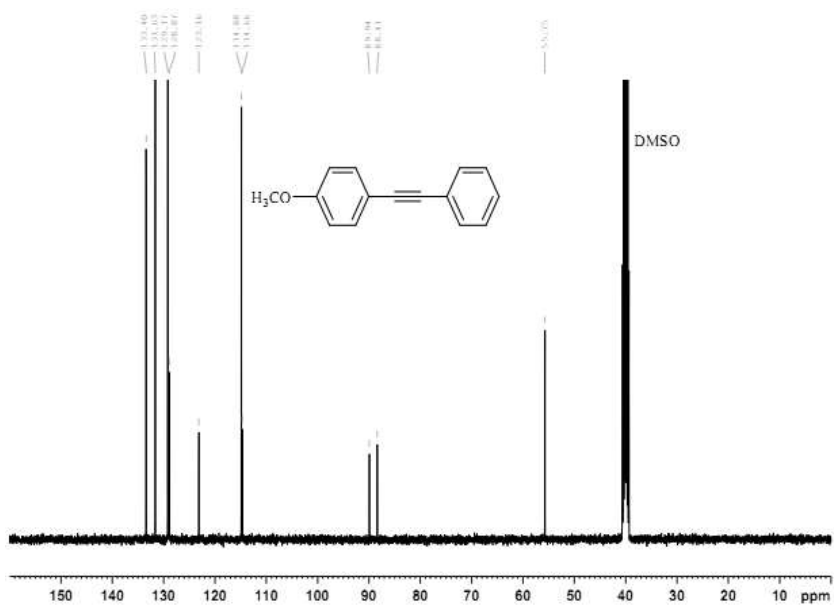

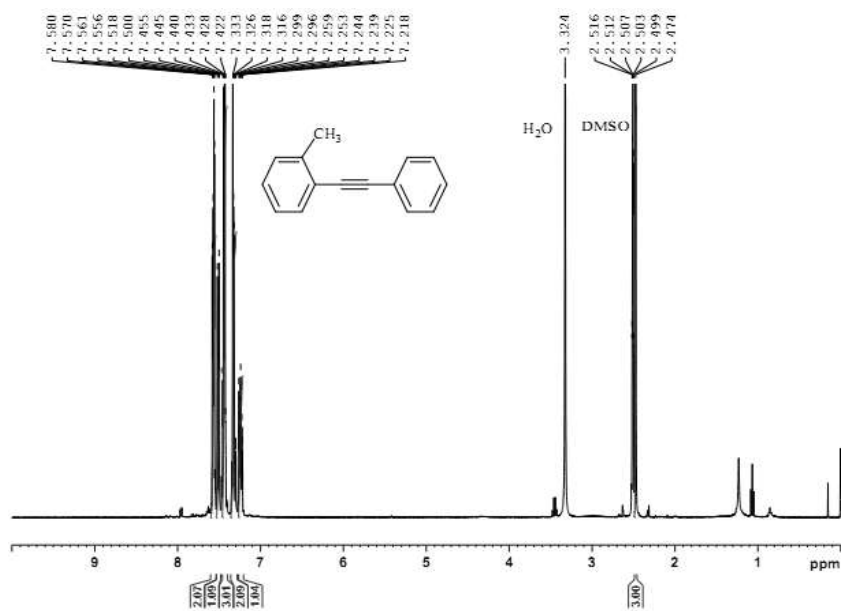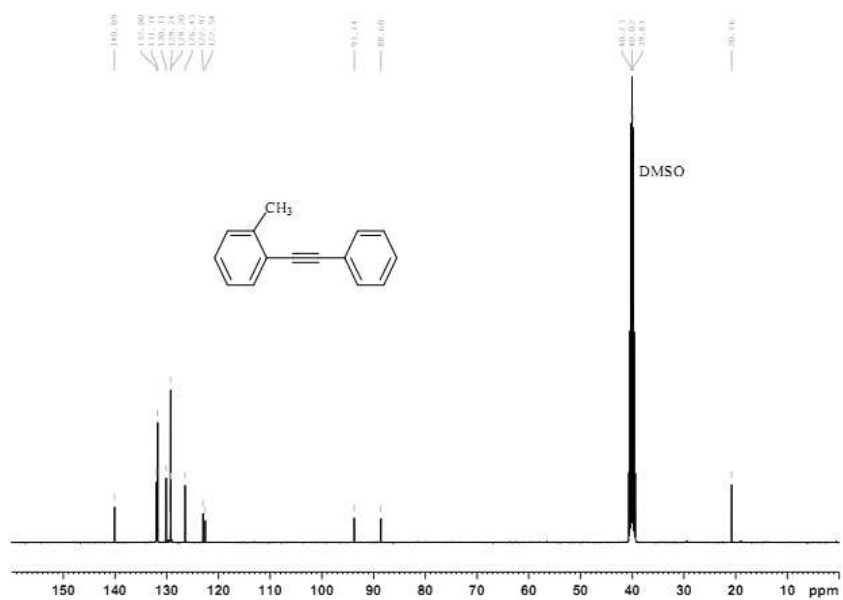

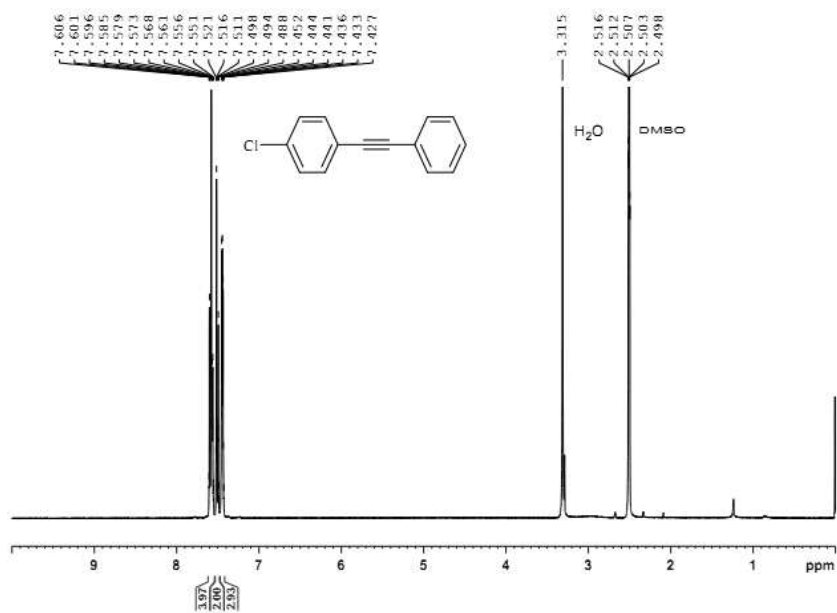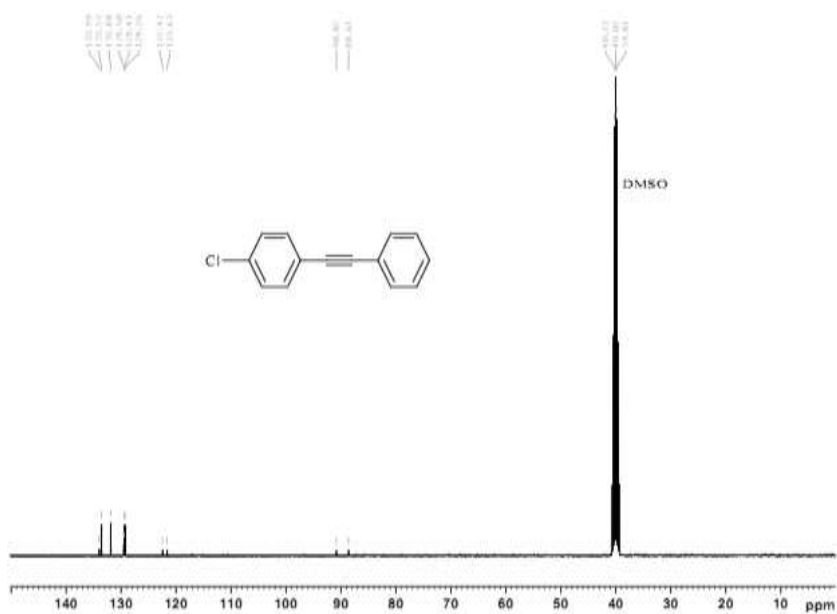

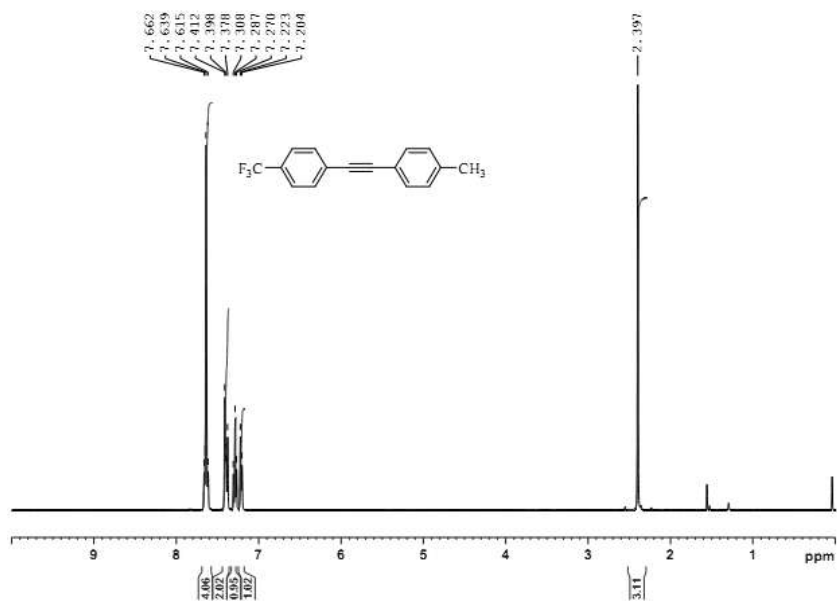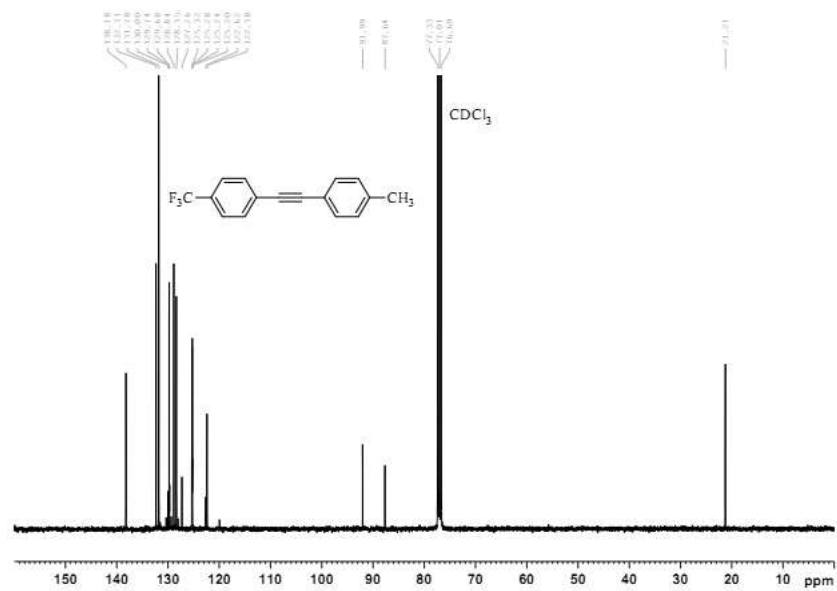

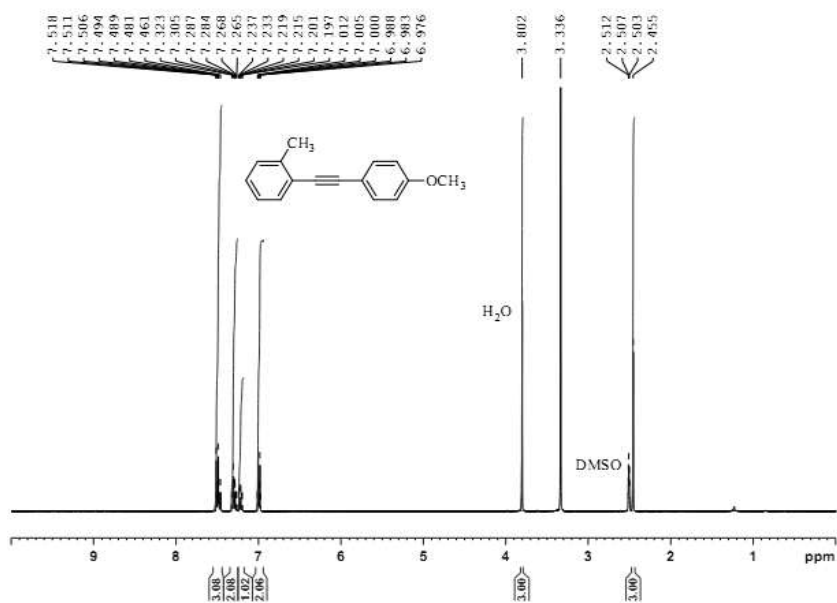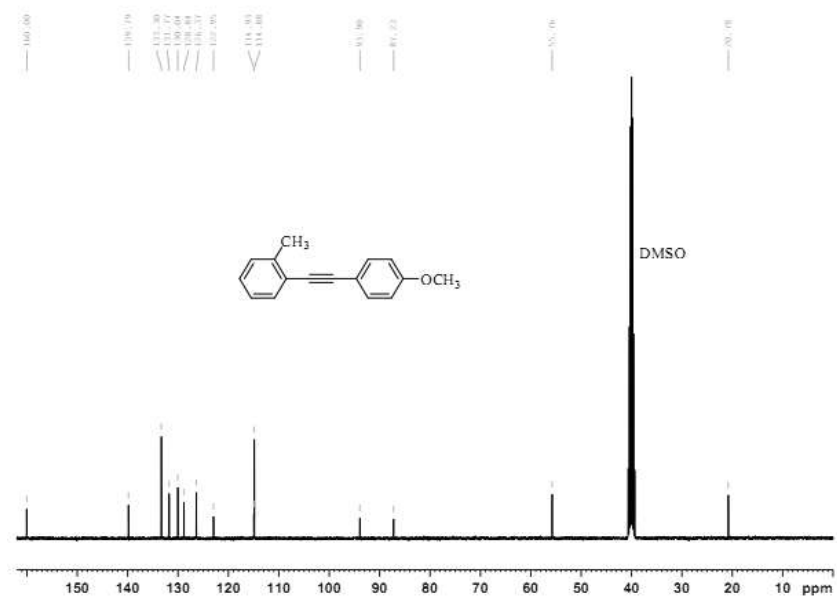



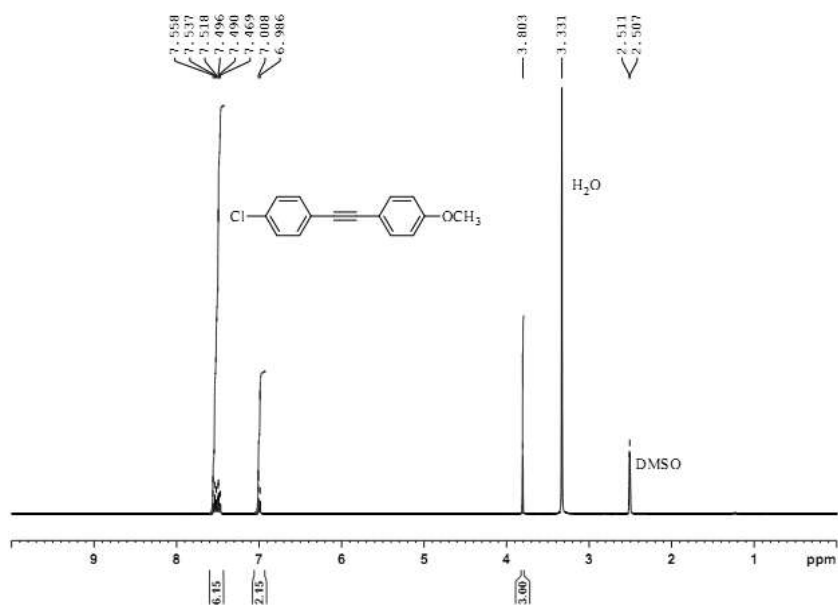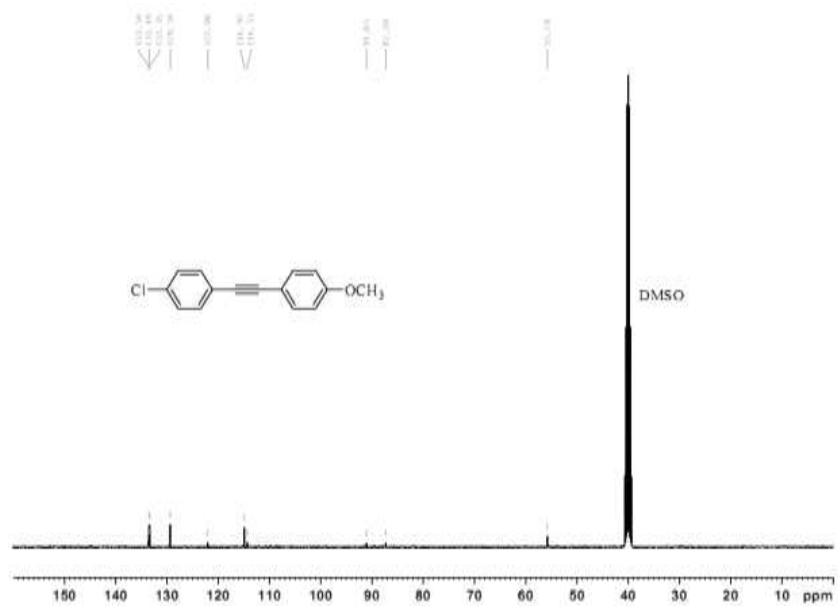

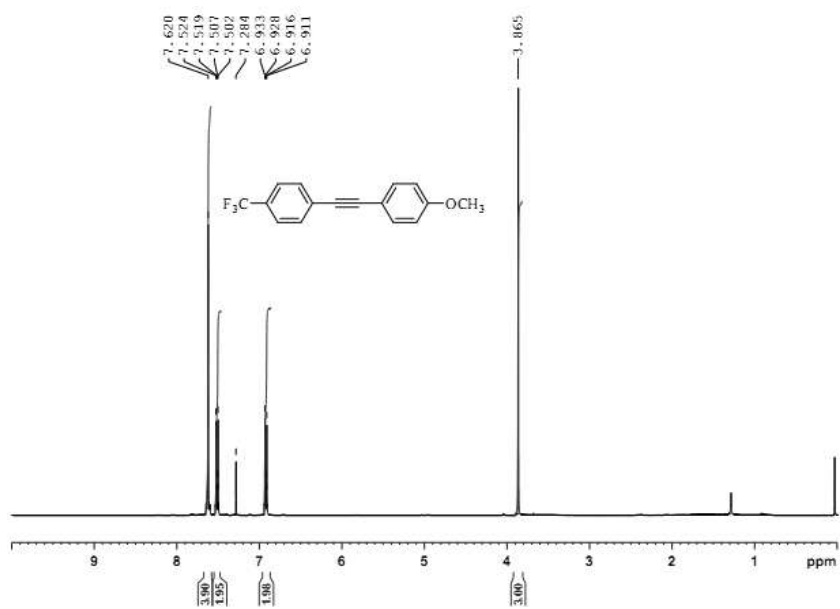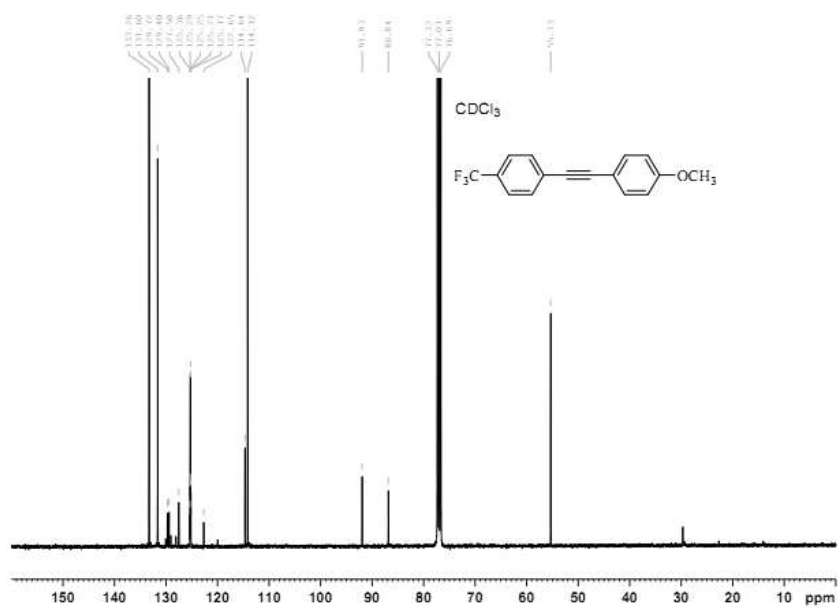

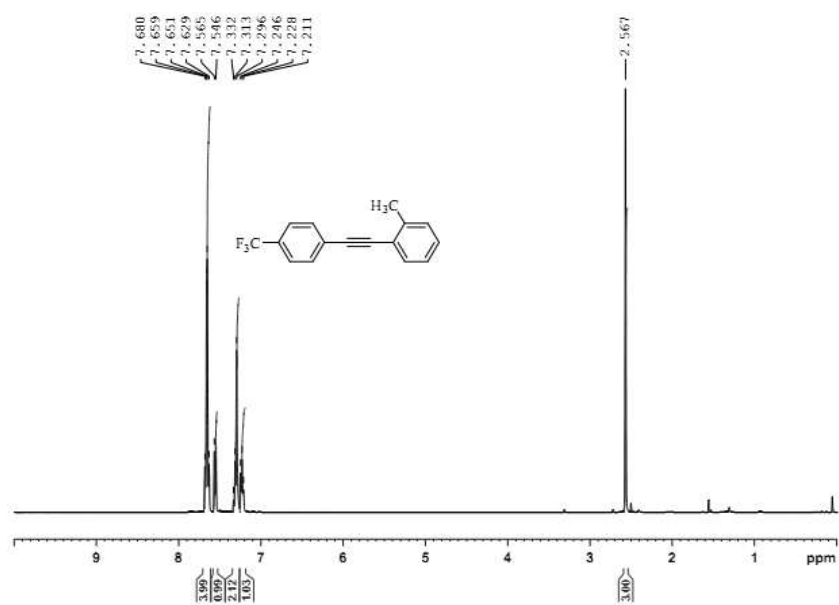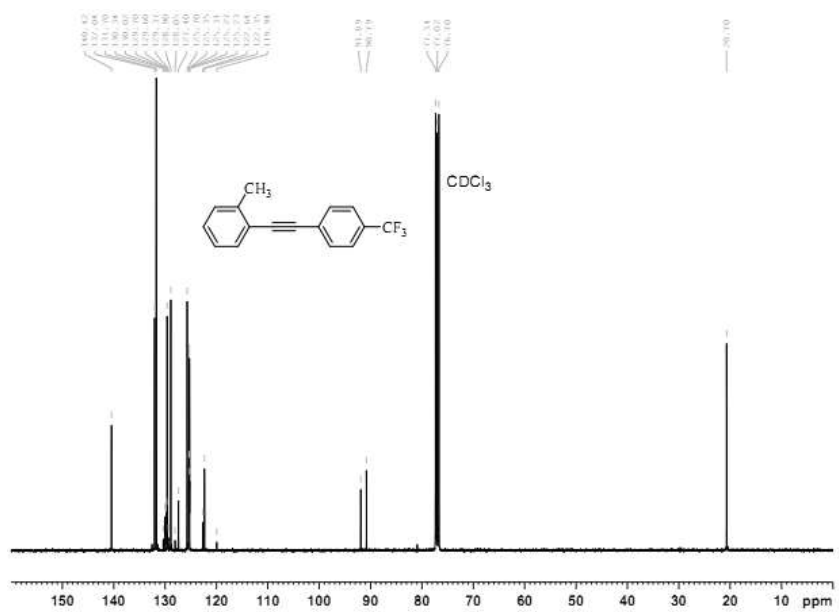

Supplement: c3dt52970c.pdf [file c3dt52970c.pdf]
